# Supplementary material
Source: publisher figshare collection journal article supplement (https://gsapubs.figshare.com/ndownloader/files/22756559)

## **GSA Data repository Item for:**

**Hounslow et al. “Bio-magnetostratigraphy of the Vikinghøgda Formation, Svalbard (arctic Norway) and the geomagnetic polarity timescale for the Lower Triassic”**

### ***The nature of the overprint magnetisation in the Vikinghøgda Formation.***

A lower stability overprint direction (remagnetisation) is often present in the samples from Vikinghøgda, and frequently forms a substantial part of the NRM intensity. This overprint direction was isolated as a linear segment from the demagnetisation data, using the software detailed by Kent et al. (1983). In 32% of specimens this overprint was fitted from the NRM direction, with the remainder of the line-fits from either the first thermal demagnetisation step (often at 200°C), or the initial stages of alternating field demagnetisation. This is a reflection that some 68% of specimens also included a lower stability ‘laboratory viscous’ magnetisation (which was not analyzed) superimposed on the stronger overprint magnetisation.

The overprint directions from the interpreted Triassic reverse polarity specimens are notably more dispersed than those from the interpreted Triassic normal polarity specimens (Fig. DR2), with Fisher-  $k$  values less than 10 for the ‘reverse overprint’ compared to greater than 10 for the ‘normal overprint’ specimens (Fig. DR2, Table DR1). The average precision of the principle component (PCA) line-fits for the overprint directions are similar, except for those from ‘normal polarity’ specimens in the Lusitaniadalen Member (Table DR1). This suggests that at least for the Deltadalen and Vendomdalen members that the directional scatter evident in Figure DR2 is not related to the precision of the fitted lines. The ‘normal polarity’ overprints from the Lusitaniadalen Member are anomalous in this respect, since the average precision of the line fits is some half of that in the other units (Table DR1). This is likely a reflection of several features. Firstly, most of these ‘normal polarity’ specimens come from the upper part of the Lusitaniadalen Member, in which the samples were dominantly collected from early diagenetic calcite concretions. Secondly, most of the calcite concretions have significantly elevated NRM intensity compared to the sandstone and siltstone lithologies in other parts of the sections (Fig. DR3a). Thirdly, the calcite concretions are some twice as

likely to retain only the overprint magnetisation, compared to other types of lithologies (Fig. DR3b). These factors likely account for the greater average precision of the overprint PCA line fits for the ‘normal polarity’ specimens from the Lusitaniadalen Member.

The mean overprint direction of the ‘normal polarity’ specimens falls in the NE quadrant, whereas that for the ‘reverse-polarity’ is notably displaced to the west (Table DR1, Fig. DR2). The 95% confidence interval of the mean direction of each of the three members includes the geocentric axial dipole field (GADF) direction (Fig. DR2). Whereas the 95% confidence interval of the mean overprint direction of the reverse polarity specimens, does not include the GADF direction (Table DR1).

We interpret the overprint as probably a composite magnetisation, consisting mostly of a remagnetisation with a field direction similar to the GADF (Brunhes age?), with the addition of a small (and variable from specimen to specimen) amount of Triassic magnetisation. This interpretation can account for the dispersion and directional bias seen between the interpreted Triassic reverse and normal polarity specimens. It also accords with the great-circle behaviour seen by many specimens during demagnetisation, indicating the strong overlap of the Triassic magnetisation and the Brunhes-age overprint.

## REFERENCES

- Hounslow, M.W., Hu, M., Mørk, A., Weitschat, W., Vigran, J.O., Karloukovski, V. and Orchard, M.J., 2008, Intercalibration of Boreal and Tethyan timescales: the magneto-biostratigraphy of the Middle Triassic and the latest Early Triassic, central Spitsbergen (arctic Norway): Polar Research. (in press)
- Kent, J.T., Briden, J.C., and Mardia, K.V., 1983, Linear and planar structure in ordered multivariate data as applied to progressive demagnetisation of palaeomagnetic remanence: Geophysics Journal Royal Astronomical Society, v. 81, p. 75-87.
- McFadden, P.L., and McElhinney, M.W., 1988, The combined analysis of remagnetisation circles and direct observations in paleomagnetism: Earth and Planetary Science Letters, v. 87, p. 161-172.

| Member (polarity)     | Fisher Mean |      |      |               |     | VGP  |       | PCA           |
|-----------------------|-------------|------|------|---------------|-----|------|-------|---------------|
|                       | Dec.        | Inc. | k    | $\alpha_{95}$ | Nl  | Lat. | Long. | $\alpha_{95}$ |
| Vendomdalen Mb (R+N)  | 296         | 68   | 13.8 | 9.4           | 19  | 55   | 276   | 10.3          |
| Vendomdalen Mb (N)    | 303         | 73   | 16.2 | 10.2          | 15  | 63   | 273   | 10.8          |
| Lusitaniadalen Mb (R) | 232         | 85   | 9.2  | 5.8           | 50  | 71   | 353   | 11.4          |
| Lusitaniadalen Mb (N) | 15          | 84   | 14.3 | 4.5           | 73  | 87   | 102   | 5.1           |
| Deltadalen Mb (R)     | 329         | 76   | 5.8  | 9             | 52  | 73   | 247   | 11.8          |
| Deltadalen Mb (N)     | 57          | 85   | 13.4 | 7.3           | 31  | 80   | 70    | 11.3          |
| All reverse polarity  | 306         | 81   | 5.6  | 6.4           | 107 | 76   | 294   | -             |
| All normal polarity   | 15          | 85   | 12.2 | 4.5           | 89  | 87   | 67    | -             |

Table DR1. Summary of the overprint mean directions from the Vikinghøgda Fm, Vikinghøgda

(prior to bedding correction). This excludes those specimens which were not assigned a polarity, but are displayed in Fig. DR2. Nl=number of specimens using with fitted lines, used in the determining the mean direction.  $\alpha_{95}$ , Fisher 95% cone of confidence. k, Fisher precision parameter. Lat. and Long. are the latitude and longitude of the mean virtual geomagnetic pole. The PCA  $\alpha_{95}$  is the average Fisher  $\alpha_{95}$  measuring the precision of the line fitted to the overprint direction for each specimen. GADF field inclination is 84°.

| Sample level                 | Height (m) | Dec.       | Inc.      | R-bar        | Nl/Np            | VGP Latitude |
|------------------------------|------------|------------|-----------|--------------|------------------|--------------|
| <b>Botneheia Formation</b>   |            |            |           |              |                  |              |
| VM1                          | 257.0      | 005        | 60        | 0.971        | 1/1              | 68           |
| VM2                          | 256.3      | <b>017</b> | <b>56</b> | <b>0.994</b> | <b>2/0</b>       | <b>72</b>    |
| VM3                          | 254.5      | <b>057</b> | <b>63</b> | <b>0.989</b> | <b>2/0</b>       | <b>73</b>    |
| <b>Vendomdalen Member</b>    |            |            |           |              |                  |              |
| VM4                          | 252.0      | 044        | 67        | 0.987        | 3/0              | 83           |
| VM5                          | 249.8      |            |           |              | 0/1 <sup>+</sup> |              |
| VM6                          | 243.0      | 048        | 38        |              | 1/0 <sup>#</sup> | 59           |
| VM18                         | 240.3      | 041        | 83        | 1.000        | 0/2              | 64           |
| VM7                          | 237.3      | <b>058</b> | <b>61</b> | <b>0.997</b> | <b>2/0</b>       | <b>71</b>    |
| VM8                          | 234.4      | 024        | 72        | 0.996        | 1/1              | 81           |
| VM9                          | 231.4      | <b>065</b> | <b>60</b> | <b>1.000</b> | <b>2/0</b>       | <b>66</b>    |
| VM10                         | 224.0      | <b>043</b> | <b>67</b> | <b>0.993</b> | <b>2/0</b>       | <b>84</b>    |
| VM11                         | 218.3      | <b>027</b> | <b>69</b> | <b>0.999</b> | <b>2/0</b>       | <b>86</b>    |
| VM12                         | 210.8      | 115        | -52       | 0.998        | 0/3              | -20          |
| VM13                         | 202.6      | <b>044</b> | <b>70</b> | <b>0.996</b> | <b>2/0</b>       | <b>82</b>    |
| VM14                         | 188.9      | <b>014</b> | <b>70</b> | <b>0.994</b> | <b>2/0</b>       | <b>78</b>    |
| VR49+VM15                    | 186.0      | 146        | -70       | 0.987        | 0/3              | -50          |
| VR48                         | 181.2      | <b>078</b> | <b>61</b> | <b>0.989</b> | <b>3/0</b>       | <b>58</b>    |
| VR47+VM16                    | 178.7      | <b>021</b> | <b>62</b> | <b>0.997</b> | <b>5/0</b>       | <b>79</b>    |
| VR46+VM17                    | 173.6      | <b>047</b> | <b>64</b> | <b>0.979</b> | <b>3/0</b>       | <b>79</b>    |
| VR45                         | 168.8      | <b>042</b> | <b>65</b> | <b>0.996</b> | <b>3/0</b>       | <b>83</b>    |
| VR44                         | 164.3      | <b>039</b> | <b>65</b> | <b>0.984</b> | <b>3/0</b>       | <b>85</b>    |
| <b>Lusitaniadalen Member</b> |            |            |           |              |                  |              |
| VR43                         | 155.8      | <b>359</b> | <b>64</b> | <b>0.993</b> | <b>2/0</b>       | <b>68</b>    |
| VR42                         | 155.3      | <b>033</b> | <b>65</b> | <b>0.999</b> | <b>2/0</b>       | <b>85</b>    |
| VR40                         | 154.4      | <b>032</b> | <b>56</b> | <b>1.000</b> | <b>2/0</b>       | <b>75</b>    |
| VR40                         | 153.3      | 035        | 51        | 0.998        | 1/2              | 70           |
| VR39                         | 151.8      | 072        | 66        | 0.997        | 2/0              | 64           |
| VR50                         | 149.3      |            |           |              | 0/1 <sup>+</sup> |              |
| VR52                         | 146.7      | 359        | 75        | 0.999        | 0/3              | 70           |
| VR51                         | 145.6      | 016        | 57        | 1.000        | 0/2              | 72           |

|                          |       |            |                                  |              |                  |            |
|--------------------------|-------|------------|----------------------------------|--------------|------------------|------------|
| VR53                     | 144.4 | 003        | 79                               | 1.000        | 0/2              | 69         |
| VR54                     | 140.6 | 022        | 25                               | 1.000        | 0/2              | 51         |
| VR33                     | 136.0 | 034        | 66                               | 0.995        | 2/1              | 86         |
| VR32                     | 131.7 | 068        | 66                               | 0.996        | 1/1              | 66         |
| VR55                     | 128.4 | 165        | -77                              | 1.000        | 0/2              | -63        |
| VR31                     | 124.3 | 066        | 68                               |              | 1/0 <sup>#</sup> | 68         |
| VR37                     | 123.3 | 151        | -80                              | 1.000        | 0/3              | -57        |
| VR38                     | 122.0 | 060        | 67                               |              | 1/0 <sup>#</sup> | 72         |
| VR36                     | 121.2 |            |                                  |              | 0/1 <sup>+</sup> |            |
| VR35                     | 119.2 |            | only overprints                  |              | 0/0              |            |
| VR30                     | 118.3 | 038        | 74                               |              | 1/0 <sup>#</sup> | 81         |
| VR29                     | 115.8 | 356        | 74                               | 1.000        | 0/2              | 69         |
| VR27                     | 111.9 | 024        | 69                               | 0.989        | 2/0              | 86         |
| VR28                     | 109.8 | 083        | 44                               | 0.949        | 1/2              | 43         |
| VR26                     | 108.8 | 221        | -66                              | 1.000        | 0/2              | -83        |
| VR25                     | 107.4 | 244        | -72                              | 0.999        | 1/2              | -71        |
| VR24                     | 105.4 | 322        | -77                              | 1.000        | 0/2              | -38        |
| VR23                     | 104.5 | 118        | -56                              | 0.992        | 0/3              | -26        |
| VR34                     | 102.2 |            | none suitable                    |              | 0/0              |            |
| VR22                     | 100.1 | 257        | -62                              | 0.990        | 1/2              | -58        |
| VR21                     | 99.5  | 203        | -52                              | 0.900        | 0/3              | -70        |
| VR20                     | 97.9  |            |                                  |              | 0/1 <sup>+</sup> |            |
| VR19                     | 97.2  |            | 'GC trends' unable to fit planes |              | 0/0              |            |
| VR18                     | 95.3  | 078        | 46                               |              | 1/0 <sup>#</sup> | 48         |
| VR17                     | 93.6  | 150        | -69                              | 1.000        | 0/2              | -53        |
| VR1                      | 92.5  | 291        | 72                               | 0.990        | 0/3              | 36         |
| VR2                      | 89.1  | <b>215</b> | <b>-41</b>                       | <b>0.986</b> | <b>3/0</b>       | <b>-62</b> |
| VR3                      | 85.9  |            | none suitable                    |              | 0/0              |            |
| VR4                      | 80.6  | 205        | -72                              | 0.986        | 0/4              | -84        |
| VR5                      | 78.7  | 201        | -26                              | 0.945        | 1/1              | -51        |
| VR6                      | 76.9  | 200        | 25                               | 0.985        | 0/3              | -25        |
| VR7                      | 74.3  | 280        | 63                               | 1.000        | 0/2              | 23         |
| VR8                      | 73.0  | 008        | 70                               | 0.657        | 1/2              | 76         |
| VR9                      | 72.4  |            | none suitable                    |              | 0/0              |            |
| VR10                     | 68.6  | 230        | -73                              | 0.939        | 2/2              | -77        |
| <b>Deltadalen Member</b> |       |            |                                  |              |                  |            |
| VR11                     | 67.4  | 201        | -62                              | 0.993        | 2/0              | -89        |
| VR12                     | 65.7  | 203        | -29                              | 0.935        | 1/2              | -62        |
| VR15+VR13                | 64.6  | 199        | -46                              | 0.983        | 2/2              | -73        |
| VR16b+VR14b              | 62.3  | 358        | -35                              | 1.000        | 0/2              | 23         |
| DR33                     | 56.8  | 334        | -76                              | 1.000        | 0/2              | -24        |
| DR32                     | 54.7  | 049        | 49                               | 0.980        | 1/1              | 65         |
| DR31                     | 53.3  |            | only single plane                |              | 0/1 <sup>+</sup> |            |
| DR30                     | 52.3  | 050        | 53                               | 0.962        | 2/1              | 67         |
| DR29                     | 50.8  | 059        | 38                               | 1.000        | 0/2              | 53         |
| DR28                     | 49.8  | 68.5       | 62                               | 0.998        | 1/1              | 57         |
| DR25                     | 48.8  | 184        | -74                              | 0.999        | 0/3              | -71        |
| DR24                     | 48.2  | 227        | -80                              | 1.000        | 0/2              | -61        |
| DR23                     | 46.8  | 234        | -22                              | 0.986        | 0/3              | -47        |
| DR22                     | 46.1  | 193        | -53                              | 0.969        | 1/2              | -77        |
| DR21                     | 45.0  | 177        | -76                              | 0.997        | 0/3              | -66        |
| DR20                     | 43.8  | 147        | -57                              | 1.000        | 0/2              | -48        |
| DR19                     | 42.9  | <b>225</b> | <b>-45</b>                       | <b>0.967</b> | <b>2/0</b>       | <b>-65</b> |
| DR26                     | 40.9  | 246        | -45                              | 1.000        | 0/3              | -51        |
| DR27                     | 38.9  | 211        | -53                              | 0.990        | 2/1              | -78        |
| DR18                     | 36.2  | 190        | -62                              | 0.832        | 1/1              | -81        |
| DR17                     | 34.8  | 124        | -54                              | 0.976        | 0/3              | -31        |
| DR16                     | 33.4  | <b>028</b> | <b>62</b>                        | <b>0.995</b> | <b>3/0</b>       | <b>86</b>  |
| DR15                     | 32.0  | 010        | 62                               | 0.951        | 2/1              | 81         |
| DR14                     | 30.1  | 010        | 53                               | 0.955        | 2/1              | 76         |

|      |      |            |                          |              |                  |           |
|------|------|------------|--------------------------|--------------|------------------|-----------|
| DR13 | 28.4 | 064        | 54                       | 0.987        | 2/0              | 57        |
| DR12 | 25.9 | <b>039</b> | <b>61</b>                | <b>0.963</b> | <b>3/0</b>       | <b>78</b> |
| DR37 | 22.3 | 000        | 54                       | 0.994        | 1/1              | 70        |
| DR36 | 20.6 | <b>050</b> | <b>74</b>                | <b>1.000</b> | <b>2/0</b>       | <b>67</b> |
| DR35 | 19.3 | 052        | 31                       |              | 1/0 <sup>#</sup> | 53        |
| DR34 | 17.4 |            | two of opposite polarity |              | 0/0              |           |
| DR11 | 15.6 | 331        | 67                       | 0.999        | 0/3              | 55        |
| DR10 | 14.8 | 204        | -46                      | 0.933        | 1/2              | -73       |
| DR9  | 14.0 | 149        | -61                      | 0.996        | 0/3              | -51       |
| DR8  | 13.3 | 161        | -72                      | 0.999        | 0/3              | -61       |
| DR7  | 12.2 | 055        | 68                       | 0.992        | 1/1              | 68        |
| DR6  | 11.3 | 359        | 48                       | 0.964        | 1/1              | 63        |
| DR5  | 10.0 | 176        | -63                      | 1.000        | 0/3              | -71       |
| DR4  | 1.8  | 143        | -51                      | 1.000        | 0/3              | -42       |
| DR3  | 0.3  | 096        | -64                      | 0.976        | 0/3              | -21       |
| DR2  | -1.2 | 332        | -74                      | 1.000        | 0/2              | -22       |
| DR1  | -5.0 | 182        | -51                      | 0.901        | 2/1              | -69       |

Table DR2. Summary of the horizon mean directions (in stratigraphic coordinates) for the Vikinghøgda sections. NI/Np= number of ChRM planes/number of great circle planes. Those horizons which contained only specimens with suitable line-fit ChRM directions were averaged using Fisher statistics (marked in bold), whereas others containing specimens with fitted great-circles were averaged using the method of McFadden & McElhinney (1988). R-bar is the mean resultant length  $[R/(NI+Np)]$  as a measure of the dispersion (since Fisher k or a confidence cone is of dubious value for such low numbers of specimens at each level). <sup>#</sup> single suitable specimen with ChRM line-fit; <sup>+</sup> single suitable specimen with fitted great circle. Note that a mean using two planes will always give an R-bar of 1.0, since the direction given is the intersection point of the two planes. Horizon VGP latitudes based on mean directions for each respective member that the level belong to. Deltadalen Mb mean: 022.4, 62.7,  $k=11.5$ ,  $\alpha_{95}=7.2$ ,  $n=38$ , reversal test=Rc; Lusitaniadalen Mb mean: 031.2, 68.3,  $k=16.4$ ,  $\alpha_{95}=4.9$ ,  $n=54$ , reversal; test=Rb; Vendomdalen Mb + Botneheia Fm: 033.1, 67.5,  $k=23.6$ ,  $\alpha_{95}=6.9$ ,  $n=20$ , reversal test not possible).

## Captions

Fig. DR1. Boundary interval details of the three members of the Vikinghøgda Fm. A) The basal sandstone of the Deltadalen Mb, with the two stratigraphically lowest sampling points in the Deltadalen Mb indicated with arrows. B) and C) the boundary interval between the Deltadalen and Lusitaniadalen members, with marker levels indicated in metres, and magnetostratigraphic sampling points (see Table DR2) shown in C). The dotted line is the base of the Lusitaniadalen Mb. D) and E) the boundary interval of the Lusitaniadalen and Vendomdalen members, with heights indicated in D). The arrows in D) and dotted line in E) indicate the base of the Vendomdalen Mb at the 156 m level in the section. Note the shale interbedded in the sandstone in the upper-most part of the Lusitaniadalen Mb in D).

Fig. DR2. Overprint directions extracted from each specimen (*in situ* coordinates), separated into the three members, interpreted Triassic polarity and interpreted polarity quality. The data for the Deltadalen Member includes 3 specimens from the Kapp Starostin Fm. The data for the Vendomdalen Member includes 6 specimens from the Botneheia Fm. The Fisher mean and  $\alpha_{95}$  are indicated for each plot. GADF= geocentric axial dipole field for the present-day.

Fig. DR3. a). NRM intensity and susceptibility properties of the Vikinghøgda Fm, sub-divided according to lithology. B) Percentage subdivision of specimen magnetisation characteristics for the Vikinghøgda Fm, sub-divided according to member, and type of sample lithology. 'Line-fits'= conventional principle components, fitted-line ChRM data (i.e. S-class data in main text). 'Great circle fits'= polarity interpreted according to great circle (remagnetisation circle) trends (i.e. T-class in main text). N=number of specimen data for each of the lithological categories. These plots also include data from the Vendomdalen Member at Milne Edwardsfjellet detailed by Hounslow et al. (2008).

Fig. Dr1

DR2008106

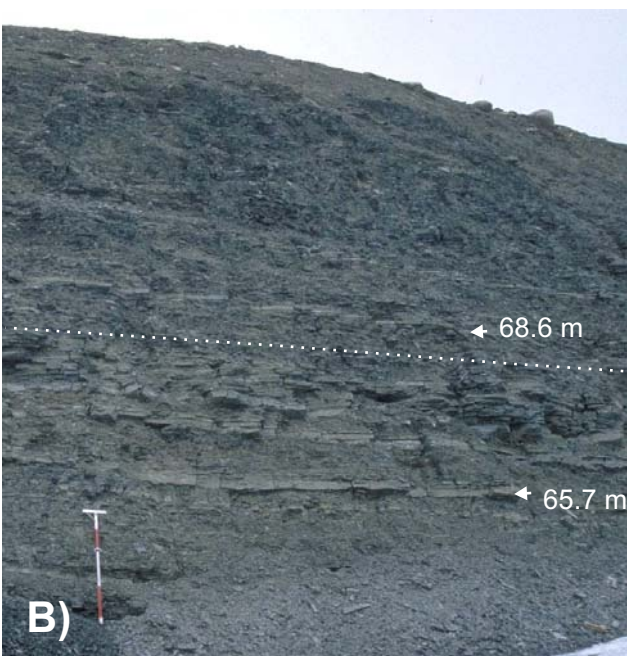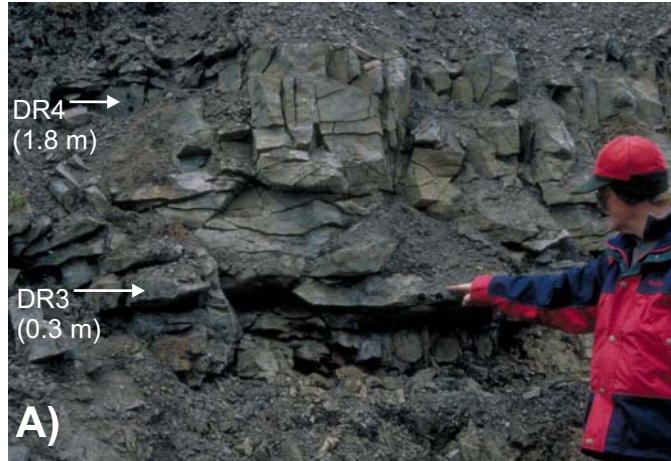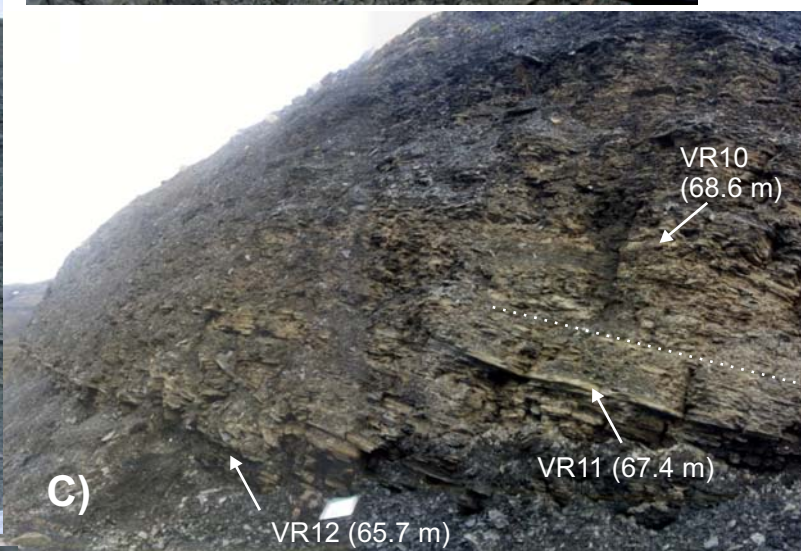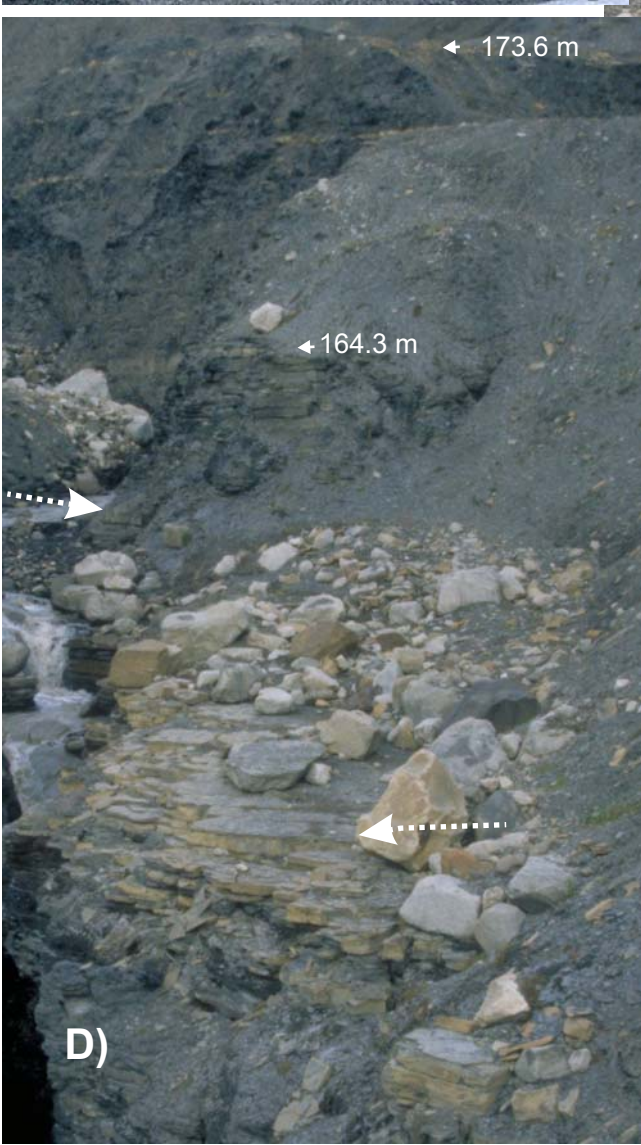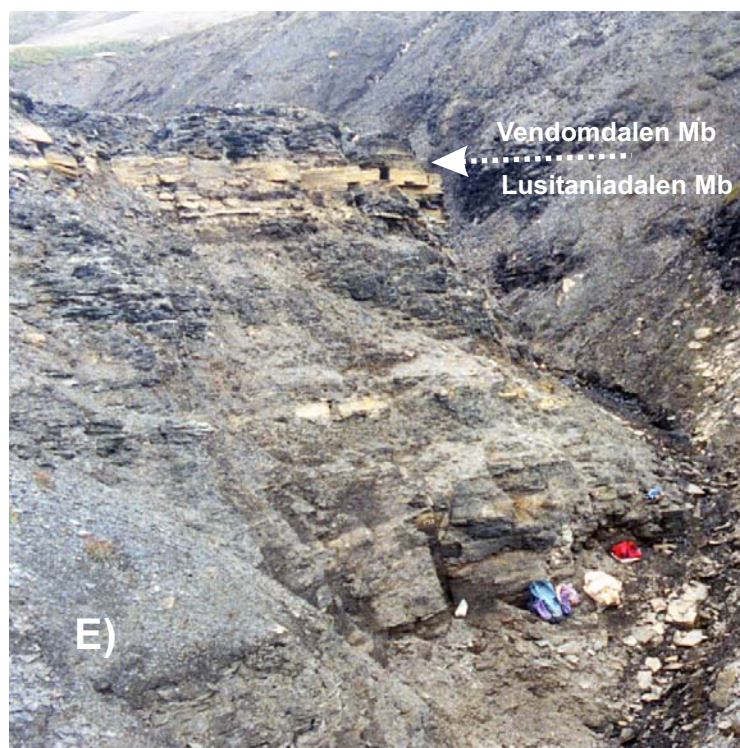

Deltadalen Mb / Lusitaniadalen Mb

## Triassic normal polarity

## Triassic reverse polarity

Deltadalen Member

Lusitaniadalen Member

Vendomdalen Member

DR2008106

N

N

N

N

N

N

## Polarity quality

N ● ○ No specimen polarity, horizon normal  
 N? ◀ ◻ No horizon polarity ? ◻  
 N?? ◼ ◻ Only overprint

▼ ▼

Mean

★ ☆

GADF direction

## Polarity quality

R ● ○  
 R? ◀ ◻  
 R?? ◼ ◻

No specimen polarity, horizon reverse

▼ ▼

Mean

★ ☆

GADF direction

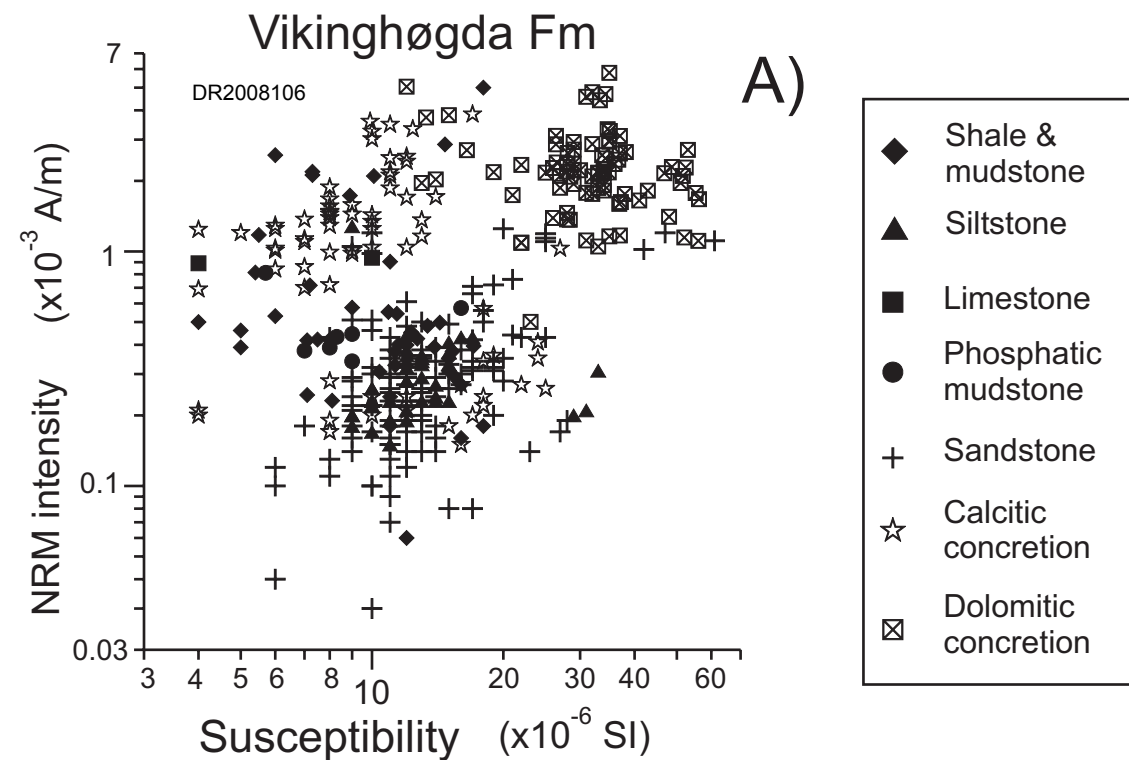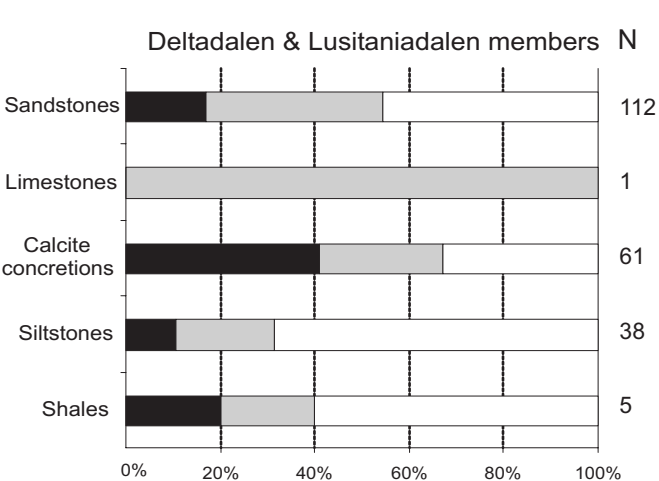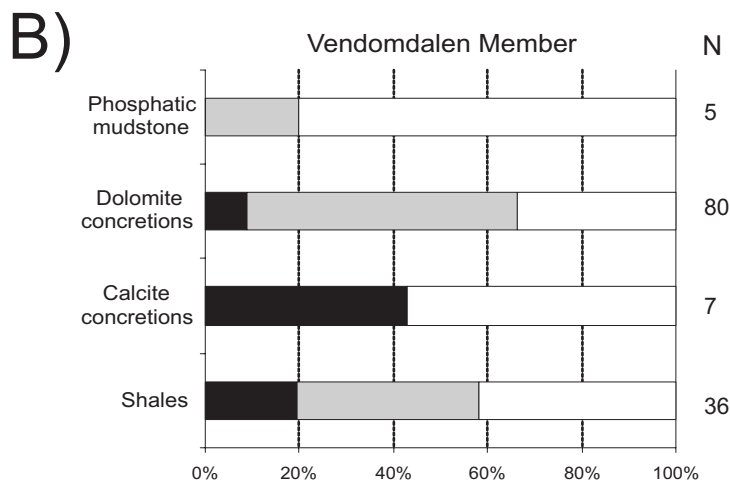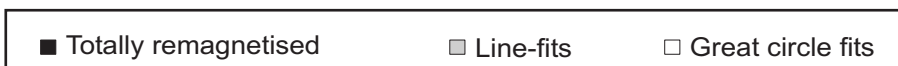

Supplement: Supplementary file 1 [file 22756559]
